# Supplementary material for: Sugar Beverage Habitation Relieves Chronic Stress-Induced Anxiety-like Behavior but Elicits Compulsive Eating Phenotype via vLSGAD2 Neurons
Source: MDPI journal article supplement (doi:10.3390/ijms24010661), 2022-12-30
Supplement: s1 [file s1]

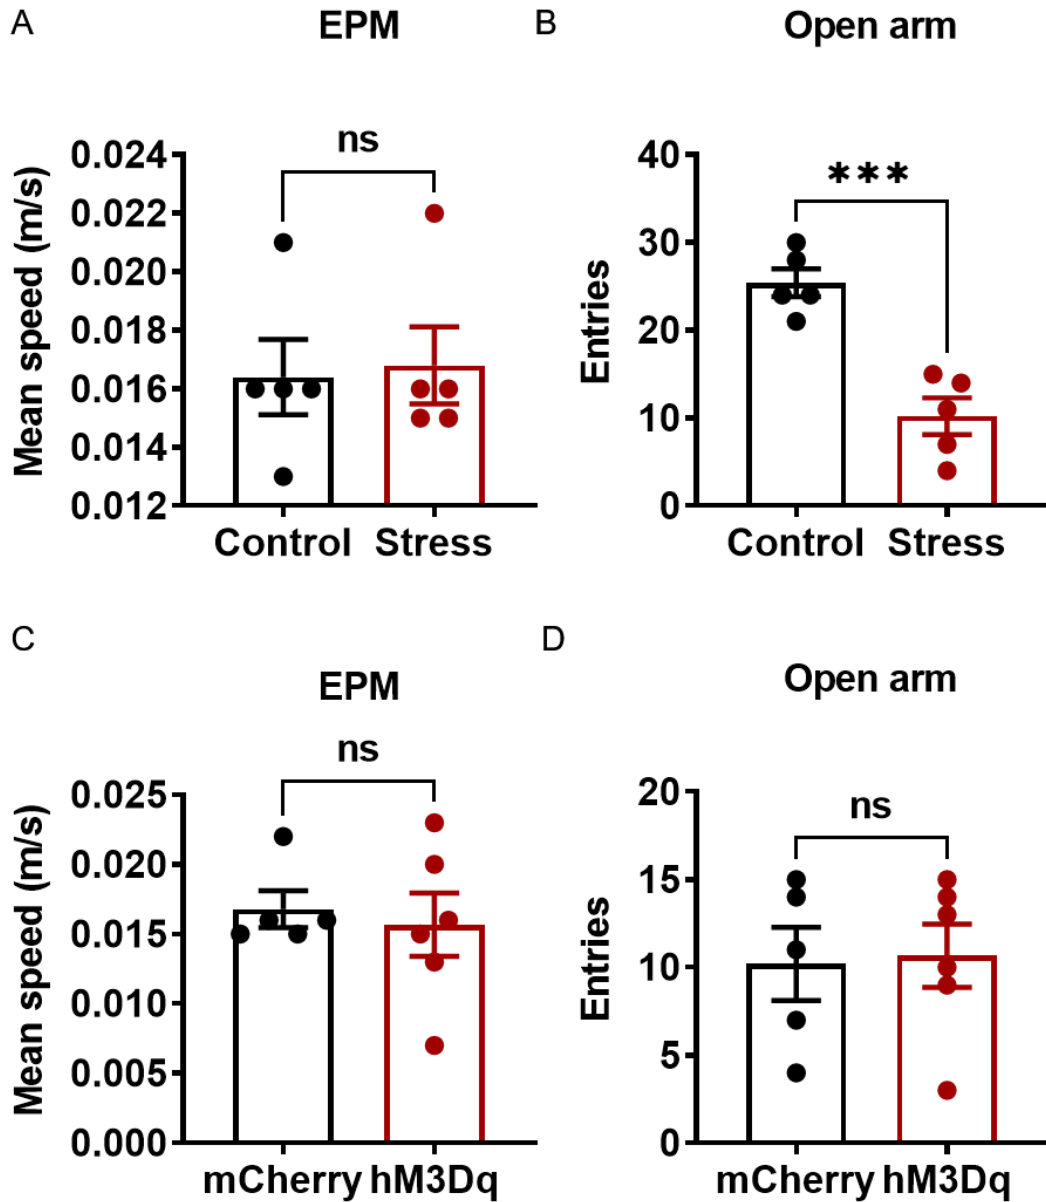

**Figure S1:** Pharmacogenetic activation of vLS<sup>GAD2</sup> neurons did not alter basal anxiety level. (A,B). Mean speed, number of entries in open arm of EPM after stress. (C,D). Mean speed, number of entries in open arm of EPM after pharmacogenetic activation vLS<sup>GAD2</sup> neurons. N = 5–6. Data were analyzed by student *t*-test and are shown as mean  $\pm$  SEM. ns, no significant difference. \*\*\*,  $p < 0.001$ .
